# Supplementary material for: Effect of solvent polarity in mechanochemistry: preparation of a conglomerate vs. racemate
Source: Royal Society of Chemistry journal article supplement (doi:10.1039/c9cc05687d), 2019-01-01
Supplement: c9cc05687d1.pdf [file c9cc05687d1.pdf]

## Electronic Supporting Information

### Effect of Solvent Polarity in Mechanochemistry: Preparation of Conglomerate vs. Racemate

Kashyap Kumar Sarmah,<sup>a</sup> Trishna Rajbongshi,<sup>a</sup> Achyut Bhuyan<sup>a</sup> and Ranjit Thakuria<sup>\*a</sup>

<sup>a</sup>Department of Chemistry, Gauhati University, Guwahati 781014, India. Email:  
[ranjit.thakuria@gmail.com](mailto:ranjit.thakuria@gmail.com), [ranjit.thakuria@gauhati.ac.in](mailto:ranjit.thakuria@gauhati.ac.in)

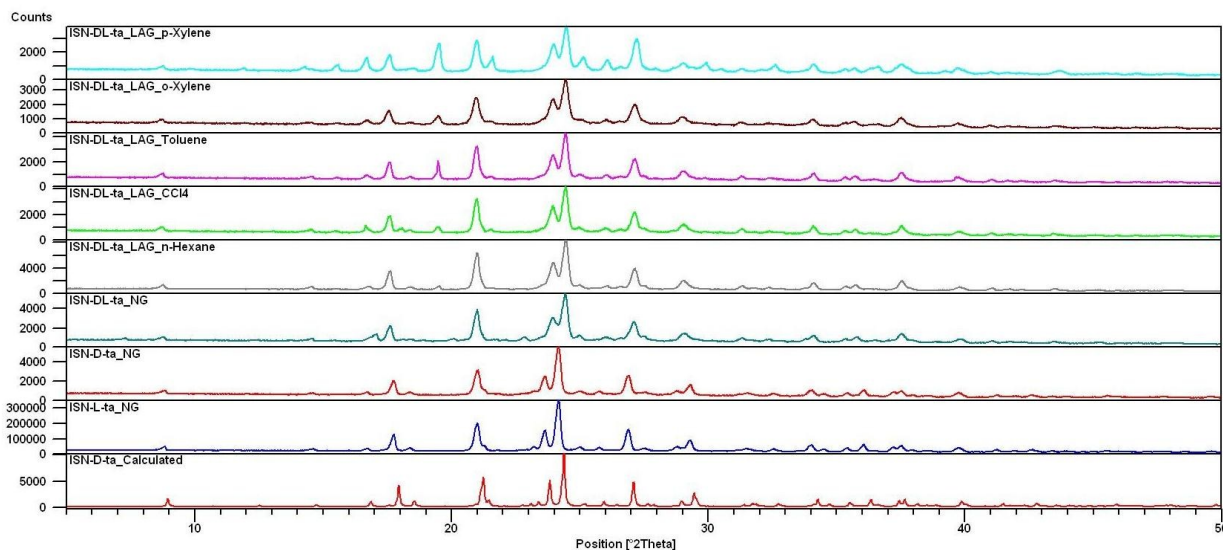

**Figure S1.** PXRD patterns of equimolar mixture of ISN and DL-ta obtained using LAG with various non-polar liquids compared with samples obtained from enantiomeric ISN-D-ta/ L-ta LAG as well as calculated powder pattern of chiral salt ISN•D-ta.

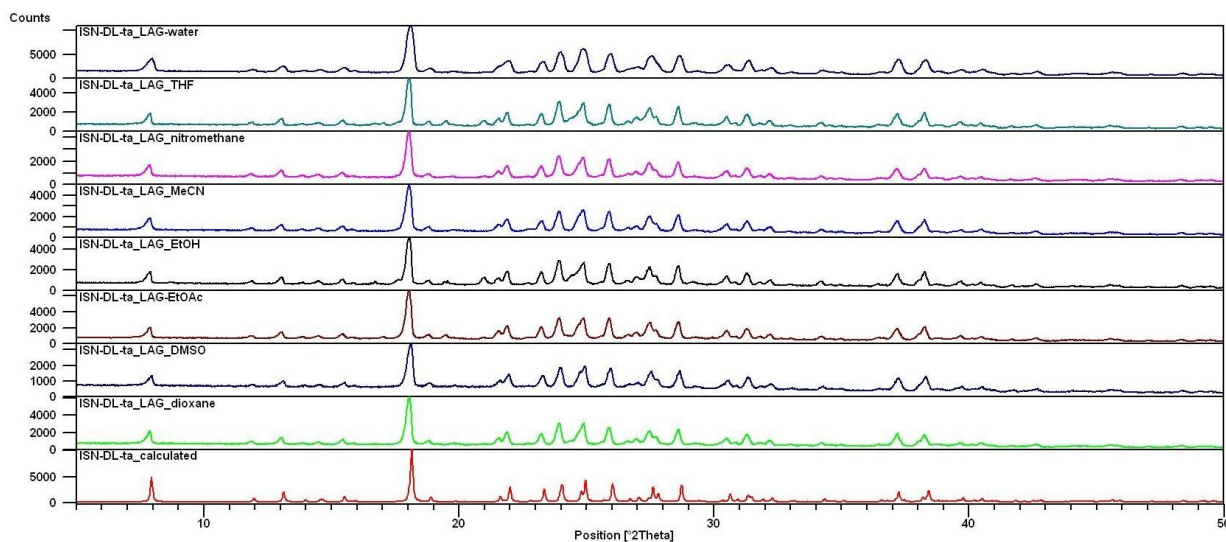

**Figure S2.** PXRD patterns of equimolar mixture of ISN and DL-ta obtained using LAG with various polar liquids compared with calculated powder pattern of racemic ISN•DL-ta salt.

ATR FT-IR spectra of the respective conglomerate and racemate of ISN and DL-ta showed characteristic shift of stretching frequency  $1720\text{--}1680\text{ cm}^{-1}$  correspond to carboxylic acid group (COOH) of tartaric acid to lower wavenumber corresponding to carboxylate group (COO<sup>-</sup>) confirms formation of salt structure for both the multicomponent solids.

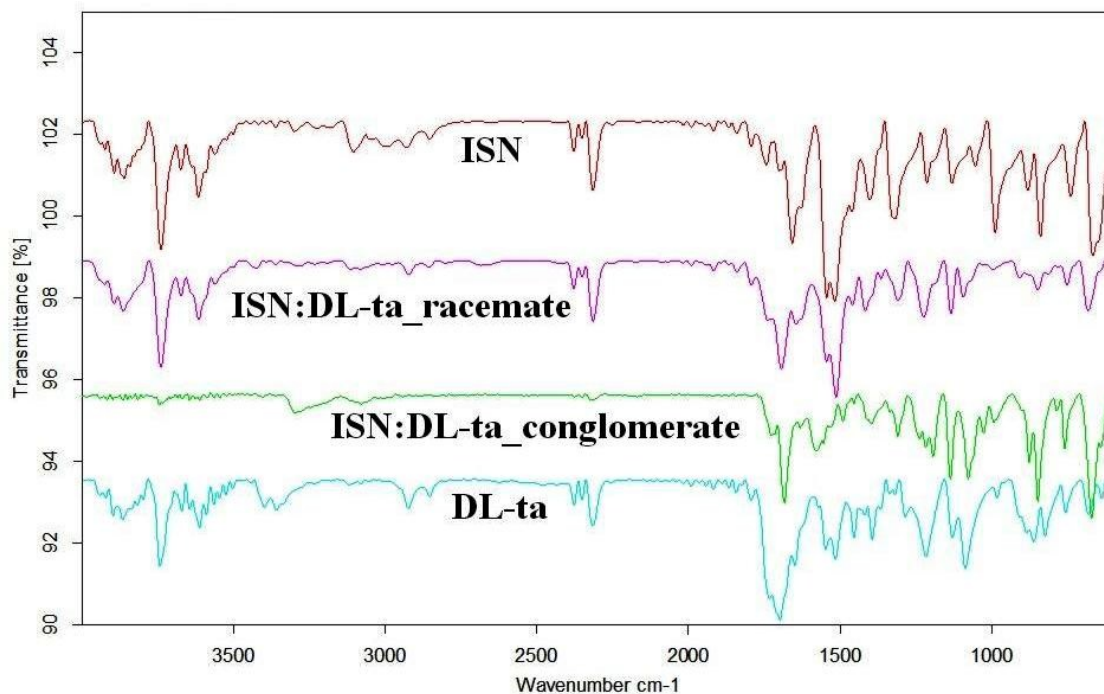

**Figure S3.** ATR FT-IR spectra of conglomerate (ISN•D-ta/ ISN•L-ta) powder samples obtained from NG and racemic salt (ISN•DL-ta) obtained from LAG with MeCN as liquid compared with respective starting materials ISN and DL-ta.

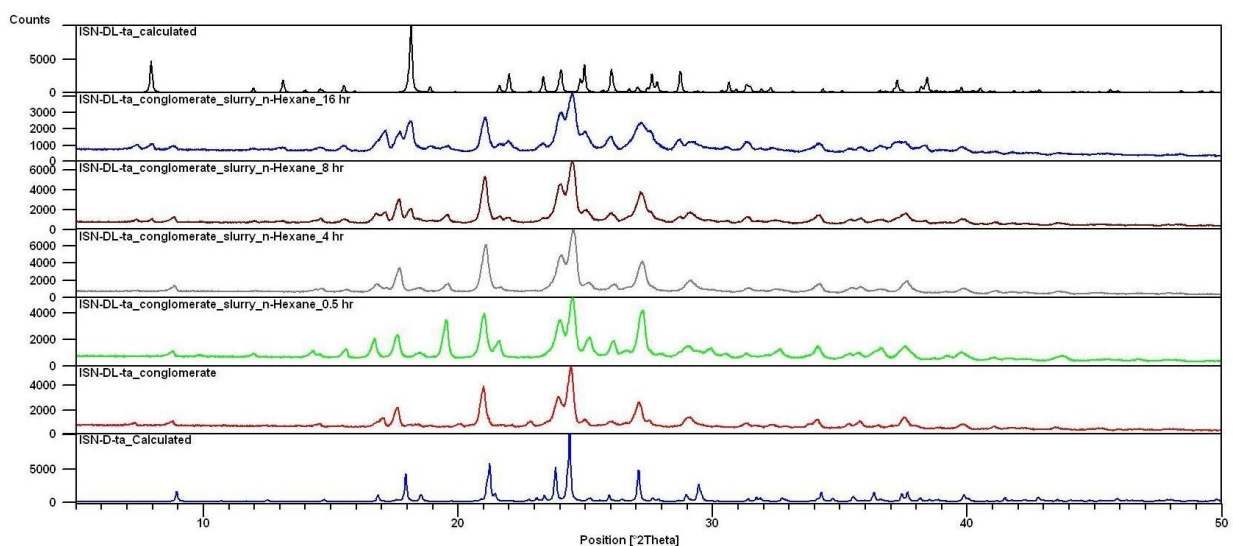

(a)

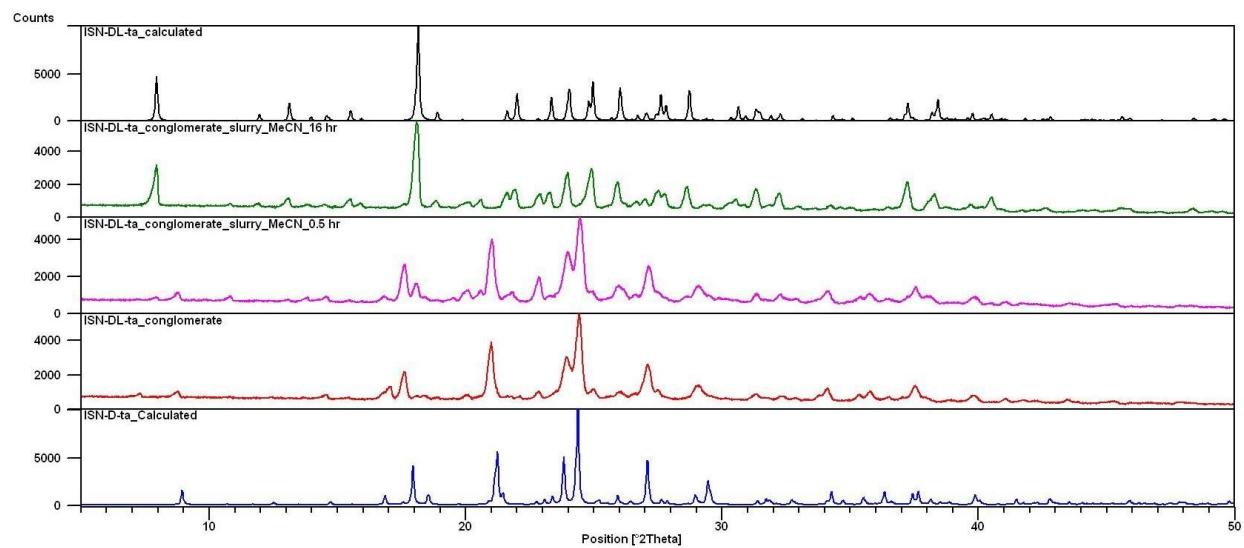

(b)

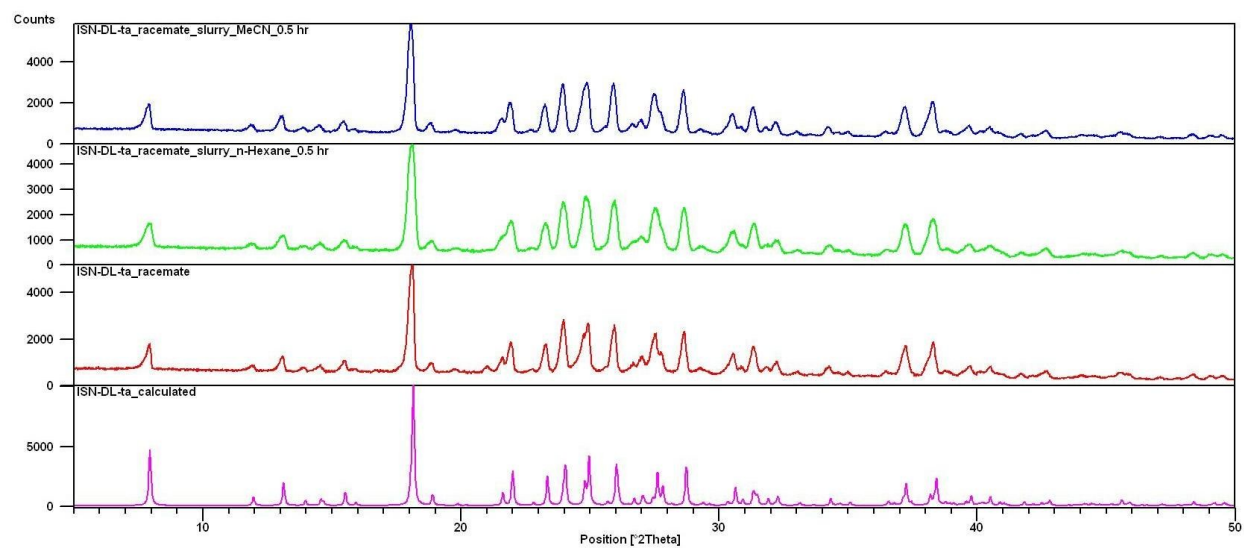

(c)

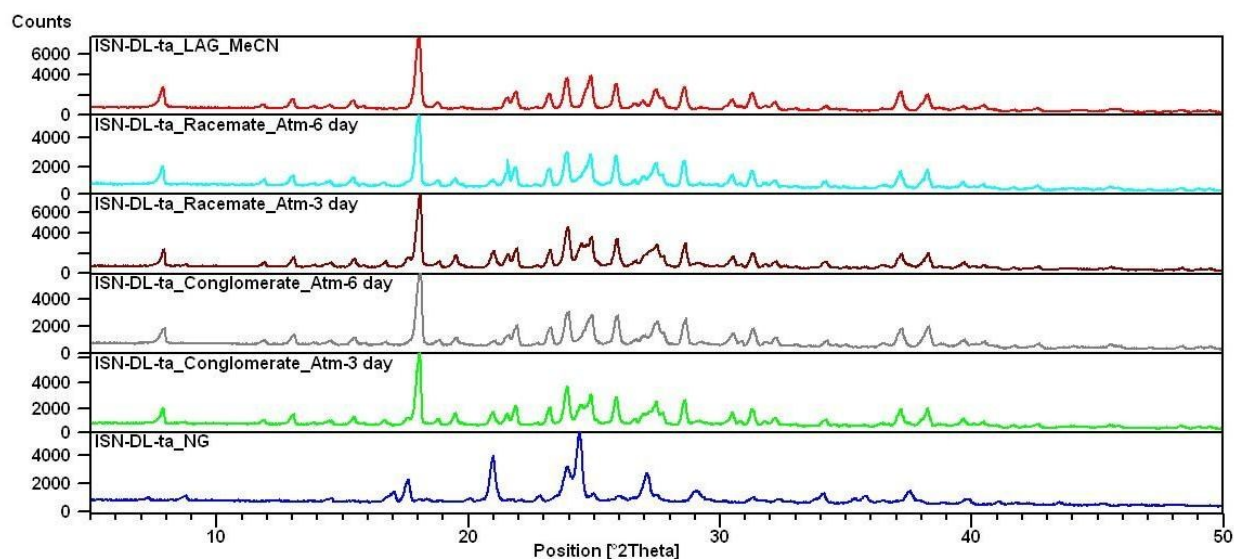

(d)

**Figure S4.** PXRD patterns of powder samples of respective conglomerate (ISN•D-ta/ ISN•L-ta) slurried in (a) hexane (non-polar solvent) and (b) MeCN (polar solvent); (c) racemic salt (ISN•DL-ta) slurried in hexane and MeCN for half an hour; (d) PXRD pattern of powder sample of conglomerate under atmospheric humidity for 3 days converts the sample to its racemic mixture, on the other hand racemate is stable under atmospheric humidity.

### Characterisation of the powder samples using DSC thermogram:

#### (a) (ISN•DL-ta) Racemic salt

The exothermic peak observed at 57.8 °C may be due to crystallization of the salt due to formation of a glassy phase prior to salt formation (not observed in the DSC thermogram). The endothermic peak at 85 °C is due to the loss of solvent acetonitrile (boiling point 82 °C) present in the surface of the powder sample prepared using LAG. The endotherm at 159 °C is the melting point of the racemic salt (ISN•DL-ta).

#### (b) (ISN•D-ta/ ISN•L-ta) Conglomerate salt

Glass transition is observed at −48 °C for the conglomerate salt. The endothermic peak at 81 °C is due to the loss of solvent carbon tetrachloride (boiling point 77 °C) present in the surface of the powder sample prepared using LAG. The endotherm at 143 °C may be due to polymorphic phase transformation (not to the racemic form as the melting point do not coincide) followed by melting at 156 °C.

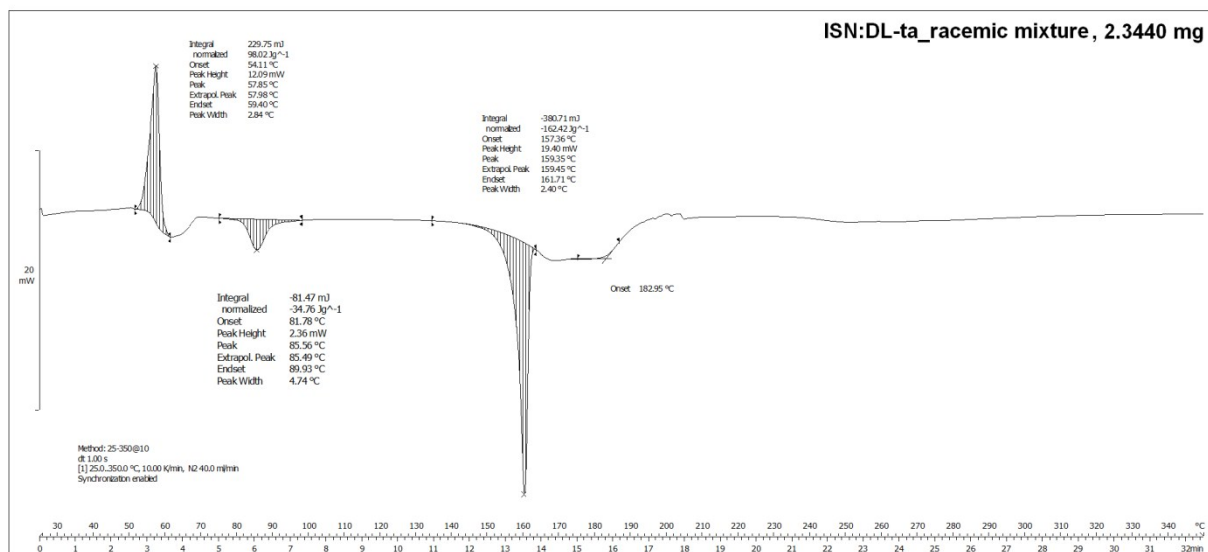

(a)

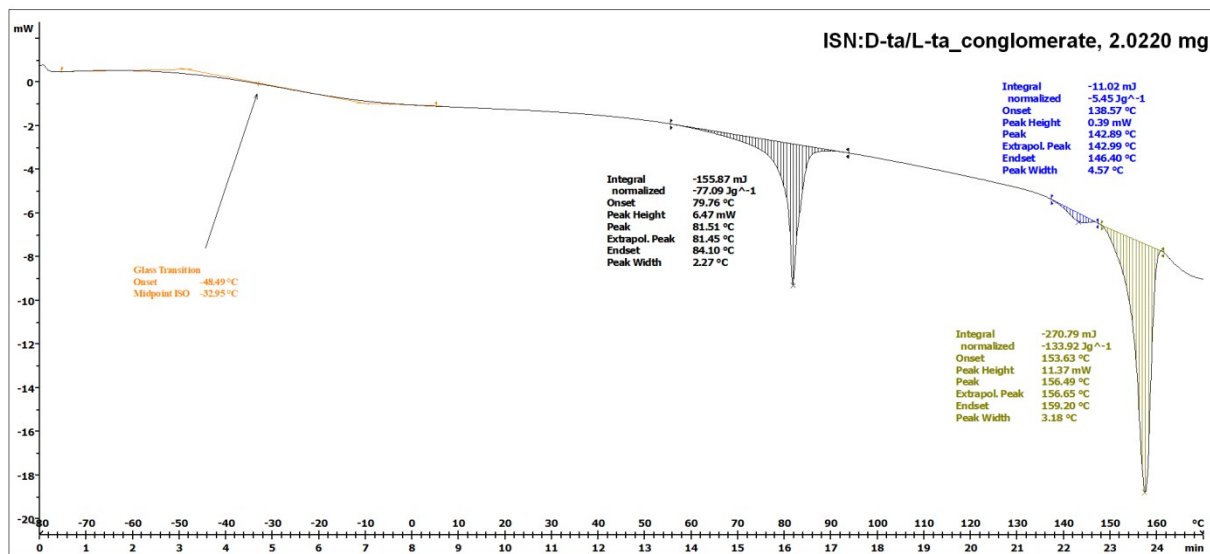

(b)

**Figure S5.** DSC endotherm of (a) racemic salt (ISN•DL-ta) and (b) conglomerate (ISN•D-ta/ISN•L-ta) powder prepared using mechanochemical grinding.

**Table S1.** Crystallographic parameter of racemic salt (ISN•DL-ta) and enantiomeric (ISN•D-ta) salt.

| Crystal data | ISN•DL-ta | ISN•D-ta | ISN•D-ta |
|--------------|-----------|----------|----------|
|              |           |          |          |

|                                                                                     |                                                               |                                                                |                                                                |
|-------------------------------------------------------------------------------------|---------------------------------------------------------------|----------------------------------------------------------------|----------------------------------------------------------------|
| Chemical formula                                                                    | C <sub>10</sub> H <sub>13</sub> N <sub>3</sub> O <sub>7</sub> | C <sub>20</sub> H <sub>26</sub> N <sub>6</sub> O <sub>14</sub> | C <sub>20</sub> H <sub>26</sub> N <sub>6</sub> O <sub>14</sub> |
| $M_r$                                                                               | 287.23                                                        | 574.47                                                         | 574.47                                                         |
| Crystal system                                                                      | Monoclinic                                                    | Orthorhombic                                                   | Orthorhombic                                                   |
| space group                                                                         | $P2_1/n$                                                      | $P2_12_12_1$                                                   | $P2_12_12_1$                                                   |
| Temperature (K)                                                                     | 296                                                           | 296                                                            | 200                                                            |
| $a$ (Å)                                                                             | 12.409 (2)                                                    | 7.8825(5)                                                      | 7.8533(2)                                                      |
| $b$ (Å)                                                                             | 7.1753 (14)                                                   | 15.1865(9)                                                     | 15.1576(4)                                                     |
| $c$ (Å)                                                                             | 14.653 (3)                                                    | 19.8838(11)                                                    | 19.7612(5)                                                     |
| $\beta$ (°)                                                                         | 113.098 (10)                                                  | 90                                                             | 90                                                             |
| $V$ (Å <sup>3</sup> )                                                               | 1200.1 (4)                                                    | 2380.2(2)                                                      | 2352.33(11)                                                    |
| $Z$                                                                                 | 4                                                             | 4                                                              | 4                                                              |
| Radiation type                                                                      | Mo $K\alpha$                                                  | Mo $K\alpha$                                                   | Mo $K\alpha$                                                   |
| Density                                                                             | 1.590                                                         | 1.441                                                          | 1.622                                                          |
| $\mu$ (mm <sup>-1</sup> )                                                           | 0.14                                                          | 0.130                                                          | 0.139                                                          |
| Diffractometer                                                                      | Bruker <i>APEX</i> -II                                        | Bruker <i>APEX</i> -II                                         | Bruker <i>APEX</i> -II                                         |
| No. of measured,<br>independent and<br>observed [ $I > 2\sigma(I)$ ]<br>reflections | 15957, 2930,<br>1893                                          | 11003, 4831, 4522                                              | 8495, 4924, 4467                                               |
| $R[F^2 > 2\sigma(F^2)]$ , ,                                                         | 0.056                                                         | 0.086                                                          | 0.063                                                          |
| $wR(F^2)$                                                                           | 0.166                                                         | 0.245                                                          | 0.178                                                          |
| $S$                                                                                 | 1.04                                                          | 1.680                                                          | 1.04                                                           |
| No. of reflections                                                                  | 2930                                                          | 4831                                                           | 4924                                                           |
| $\Delta\rho_{\max}$ , $\Delta\rho_{\min}$ (e Å <sup>-3</sup> )                      | 0.30, -0.32                                                   | 1.39, -0.82                                                    | 1.87, -0.64                                                    |

|          |         |         |         |
|----------|---------|---------|---------|
| CCDC No. | 1916551 | 1916550 | 1916549 |
|----------|---------|---------|---------|
